# Supplementary material for: Concurrent Biocatalytic Oxidation of 5-Hydroxymethylfurfural into 2,5-Furandicarboxylic Acid by Merging Galactose Oxidase with Whole Cells
Source: MDPI journal article supplement (doi:10.3390/pr11082261), 2023-07-27
Supplement: s1 [file s1]

# Concurrent Biocatalytic Oxidation of 5-Hydroxymethylfurfural into 2,5-Furandicarboxylic Acid by Merging Galactose Oxidase with Whole Cells

Fan-Feng Zhu <sup>1</sup>, Jian-Peng Wang <sup>1</sup>, Min-Hua Zong <sup>1</sup>, Zhao-Juan Zheng <sup>2</sup> and Ning Li<sup>1,\*</sup>

<sup>1</sup> School of Food Science and Engineering, South China University of Technology, 381 Wushan Road, Guangzhou 510640, China

<sup>2</sup> College of Chemical Engineering, Nanjing Forestry University, Nanjing, 210037, China

\* Correspondence: lining@scut.edu.cn

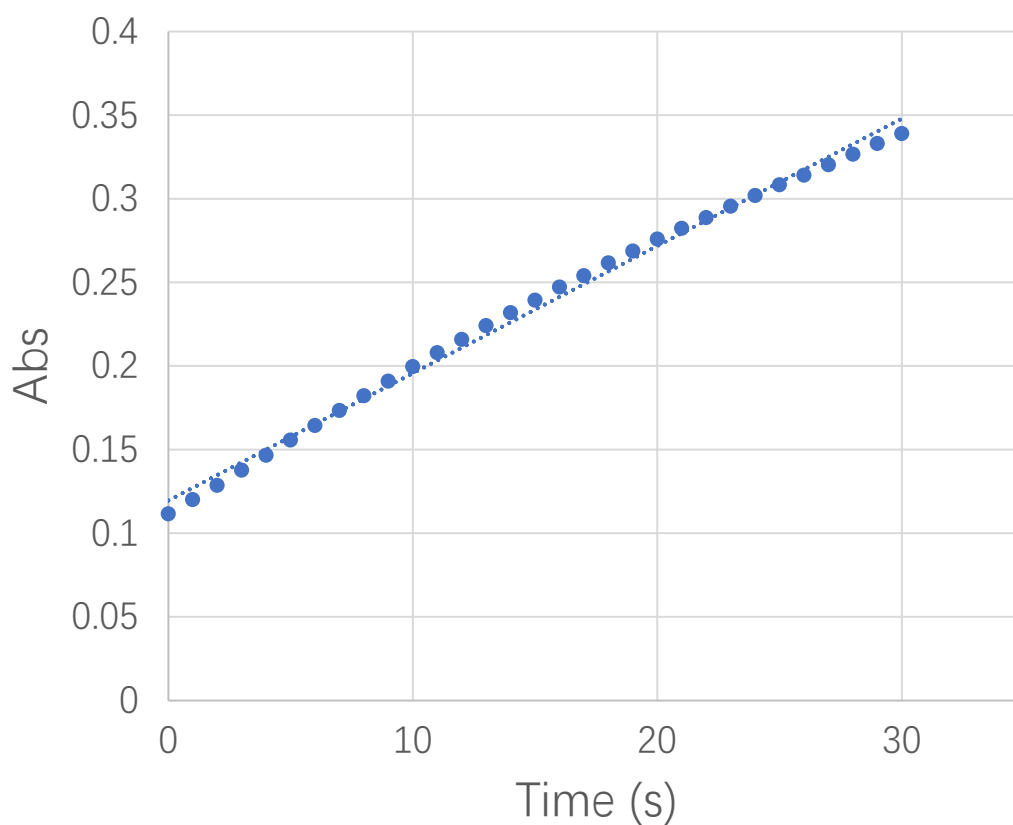

**Figure S1.** GO assay curve.

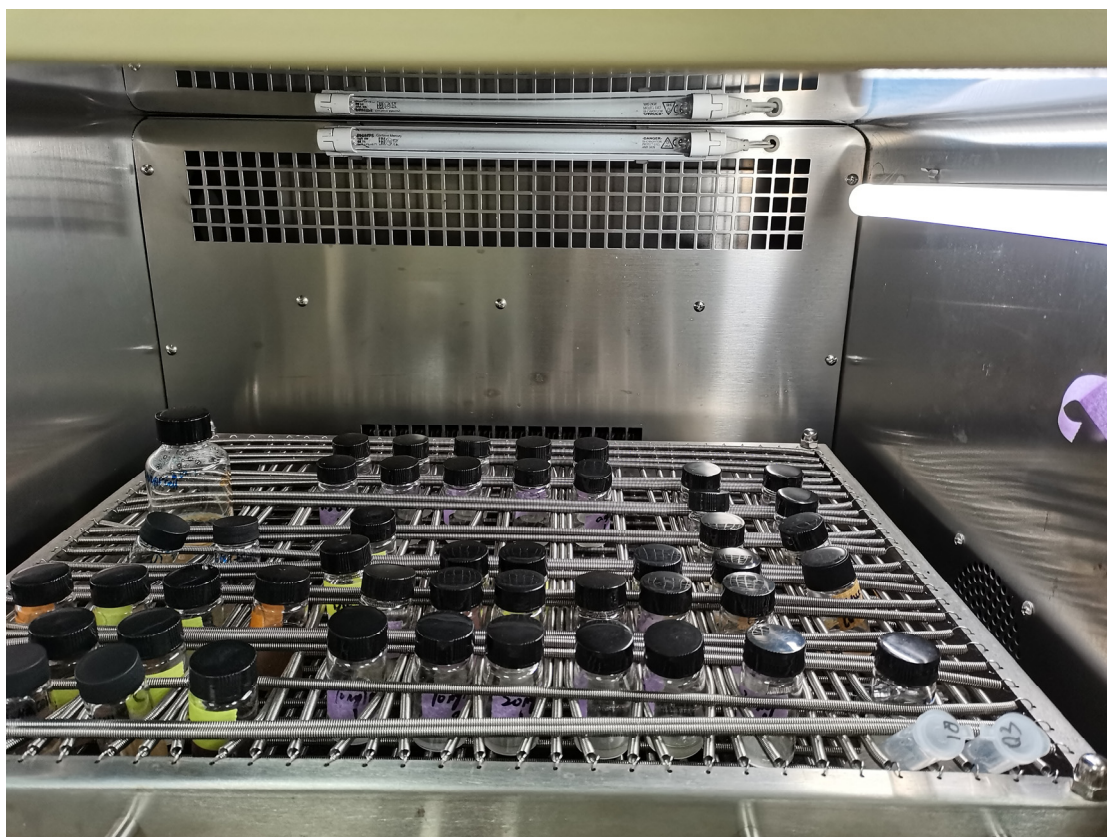

**Figure S2.** The picture of the experimental set-up.

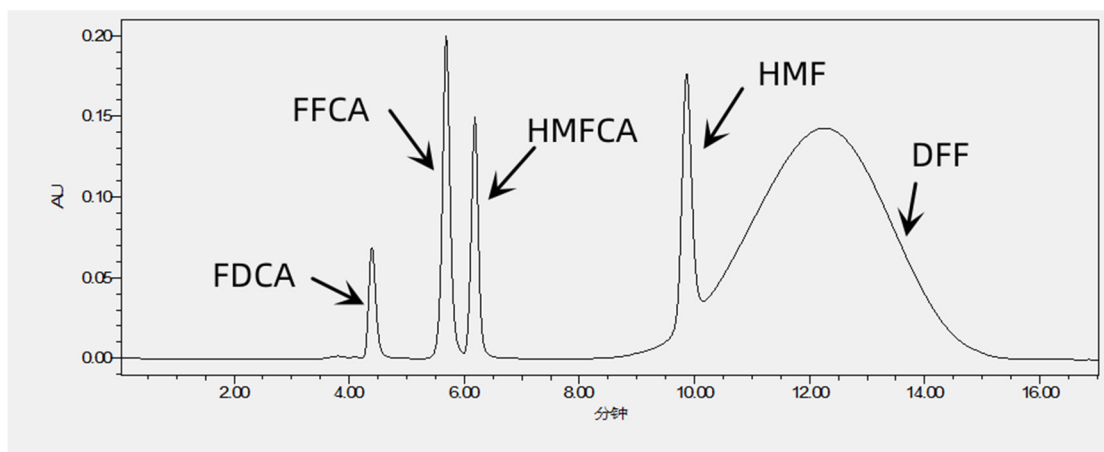

**Figure S3.** HPLC chromatogram of the reaction mixture.

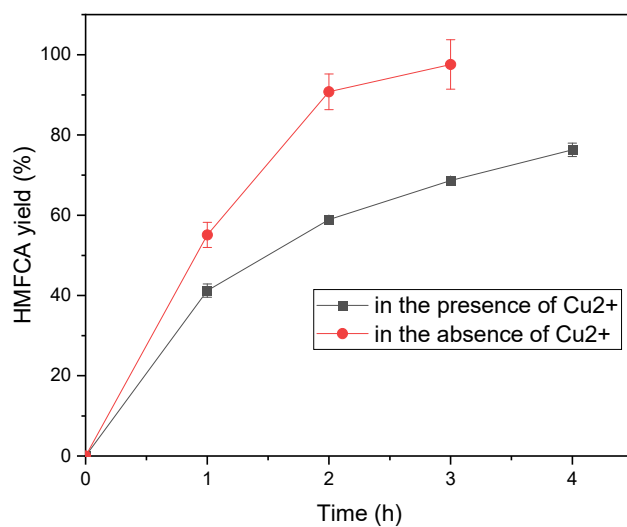

**Figure S4.** Effect of 1 mM Cu<sup>2+</sup> on the HMFCFA synthesis by *E. coli\_VDH1\_NOX* cells. Reaction conditions: 20 mM HMF, 30 mg/mL *E. coli\_VDH1\_NOX*, 1 mM CuCl<sub>2</sub>, 2 mL phosphate buffer (200 mM, pH 7), 30 °C, 150 r/min.

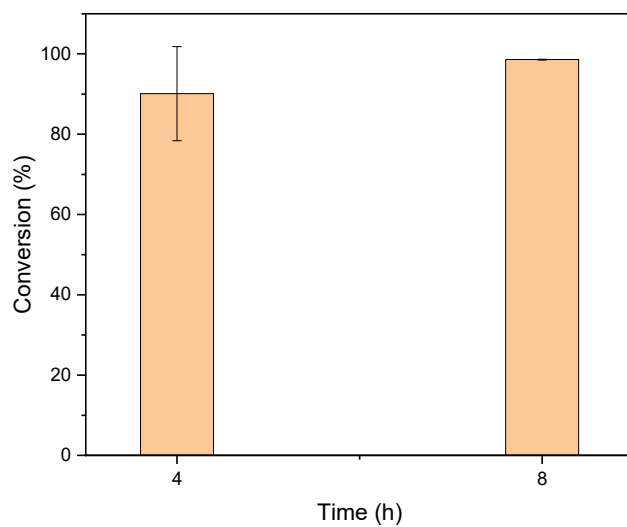

**Figure S5.** Enzymatic oxidation of HMFCFA by GO M<sub>3-5</sub> CFE. Reaction conditions: 50 mM HMFCFA, 0.25 U/mL GO M<sub>3-5</sub> CFE, 0.05 mg/mL HRP, 0.1 mg/mL catalase, 0.5 mM CuCl<sub>2</sub>, 2 mL phosphate buffer (200 mM, pH 7), 150 r/min, 30 °C.

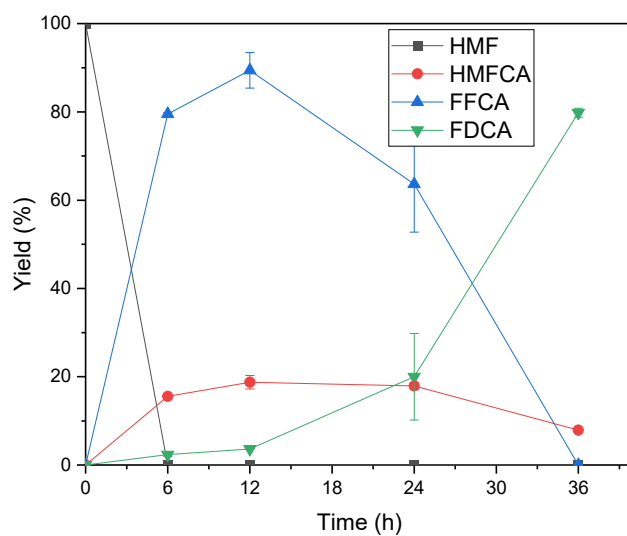

**Figure S6.** Oxidation of HMF into FDCA by GO M<sub>3-5</sub> and a high loading of *E. coli\_VDH1-NOX* cells. Reaction conditions: 20 mM HMF, 0.5 U/mL GO M<sub>3-5</sub> CFE, 0.05 mg/mL HRP, 0.1 mg/mL catalase, 0.5 mM CuCl<sub>2</sub>, 20 mg/mL *E. coli\_VDH1-NOX* (cell wet weight), 2 mL phosphate buffer (200 mM, pH 7), 30 °C, 150 r/min.

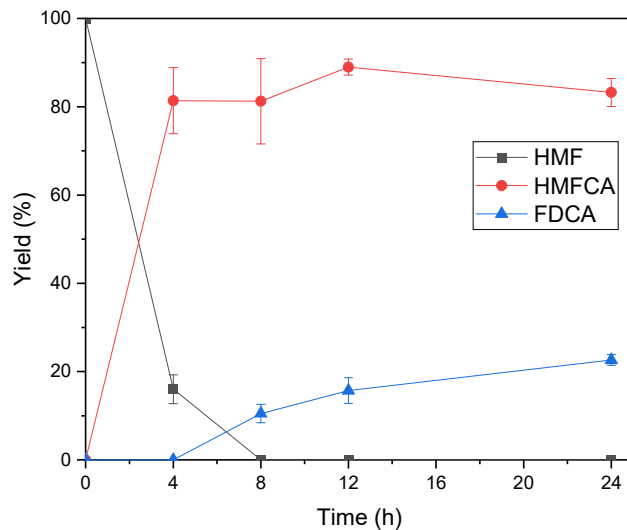

**Figure S7.** Oxidation of HMF into FDCA by GO M<sub>3-5</sub> and *E. coli\_VDH1-NOX* cells in the presence of 0.1 mM CuCl<sub>2</sub>. Reaction conditions: 20 mM HMF, 0.5 U/mL GO M<sub>3-5</sub> CFE, 0.05 mg/mL HRP, 0.1 mg/mL catalase, 0.1 mM CuCl<sub>2</sub>, 20 mg/mL *E. coli\_VDH1-NOX* (cell wet weight), 2 mL phosphate buffer (200 mM, pH 7), 30 °C, 150 r/min.

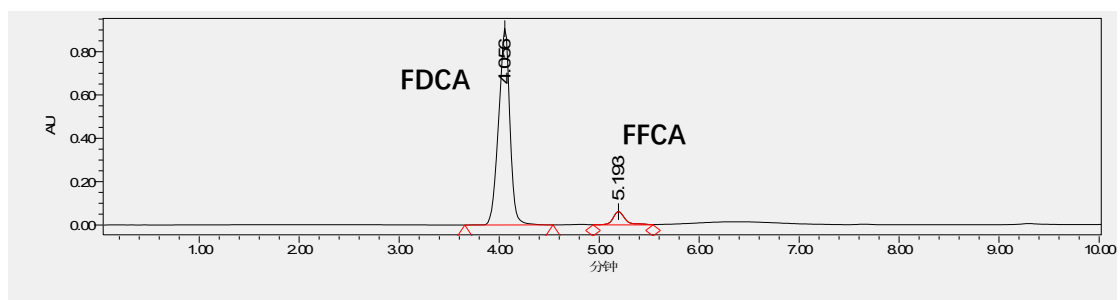

**Figure S8.** HPLC analysis of the crude product.
